# Supplementary material for: Mapping Arctic cetaceans from space: A case study for beluga and narwhal
Source: PLoS One. 2021 Aug 4;16(8):e0254380. doi: 10.1371/journal.pone.0254380 (PMC8336832; doi:10.1371/journal.pone.0254380)
Supplement: S1 Database — (CSV) [file pone.0254380.s002.csv]

LONG	LAT	OBJECT_ID	PHOTO_ID	BELUGA_OBS1	BELUGA_OBS2	UNCERTAIN_OBS1	UNCERTAIN_OBS2	BEAUFORT_STATE
-67.43185518	66.57533045	1	19AUG04163708-P2AS_R2C1-010400039010_01_P001	1	1	0	0	1
-67.43143059	66.57529409	2	19AUG04163708-P2AS_R2C1-010400039010_01_P001	1	1	0	0	1
-67.41375429	66.57592352	3	19AUG04163708-P2AS_R2C1-010400039010_01_P001	1	1	0	0	1
-67.41359385	66.57580863	4	19AUG04163708-P2AS_R2C1-010400039010_01_P001	1	1	0	0	1
-67.41054619	66.5752098	5	19AUG04163708-P2AS_R2C1-010400039010_01_P001	1	1	0	0	1
-67.41048627	66.57518384	6	19AUG04163708-P2AS_R2C1-010400039010_01_P001	1	0	0	1	1
-67.40796359	66.575045	7	19AUG04163708-P2AS_R2C1-010400039010_01_P001	1	1	0	0	1
-67.40480453	66.57577106	8	19AUG04163708-P2AS_R2C1-010400039010_01_P001	1	1	0	0	1
-67.39816885	66.57546932	9	19AUG04163708-P2AS_R2C1-010400039010_01_P001	1	1	0	0	1
-67.38993742	66.57490327	10	19AUG04163708-P2AS_R2C1-010400039010_01_P001	1	1	0	0	1
-67.38998041	66.57492822	11	19AUG04163708-P2AS_R2C1-010400039010_01_P001	1	1	0	0	1
-67.38988145	66.5749475	12	19AUG04163708-P2AS_R2C1-010400039010_01_P001	1	1	0	0	1
-67.38985127	66.57492182	13	19AUG04163708-P2AS_R2C1-010400039010_01_P001	1	1	0	0	1
-67.38991514	66.57495206	14	19AUG04163708-P2AS_R2C1-010400039010_01_P001	1	1	0	0	1
-67.38992013	66.57500621	15	19AUG04163708-P2AS_R2C1-010400039010_01_P001	1	1	0	0	1
-67.38968619	66.57494549	16	19AUG04163708-P2AS_R2C1-010400039010_01_P001	1	1	0	0	1
-67.38995335	66.57491949	17	19AUG04163708-P2AS_R2C1-010400039010_01_P001	1	1	0	0	1
-67.40242761	66.5742238	18	19AUG04163708-P2AS_R2C1-010400039010_01_P001	1	1	0	0	1
-67.40239583	66.57422263	19	19AUG04163708-P2AS_R2C1-010400039010_01_P001	1	1	0	0	1
-67.40634877	66.57489084	20	19AUG04163708-P2AS_R2C1-010400039010_01_P001	1	1	0	0	1
-67.40657124	66.57486605	21	19AUG04163708-P2AS_R2C1-010400039010_01_P001	1	1	0	0	1
-67.40655327	66.57484812	22	19AUG04163708-P2AS_R2C1-010400039010_01_P001	1	1	0	0	1
-67.40649498	66.57466411	23	19AUG04163708-P2AS_R2C1-010400039010_01_P001	1	1	0	0	1
-67.4064546	66.57463159	24	19AUG04163708-P2AS_R2C1-010400039010_01_P001	1	1	0	0	1
-67.40747766	66.57490568	25	19AUG04163708-P2AS_R2C1-010400039010_01_P001	1	1	0	0	1
-67.43227615	66.57486896	26	19AUG04163708-P2AS_R2C1-010400039010_01_P001	1	1	0	0	1
-67.43467056	66.57463508	27	19AUG04163708-P2AS_R2C1-010400039010_01_P001	1	1	0	0	1
-67.43626114	66.57477182	28	19AUG04163708-P2AS_R2C1-010400039010_01_P001	1	1	0	0	1
-67.43686761	66.57488773	29	19AUG04163708-P2AS_R2C1-010400039010_01_P001	1	0	0	1	1
-67.43734314	66.57489078	30	19AUG04163708-P2AS_R2C1-010400039010_01_P001	1	0	0	1	1
-67.44448772	66.57509027	31	19AUG04163708-P2AS_R2C1-010400039010_01_P001	1	1	0	0	1
-67.444496	66.57505992	32	19AUG04163708-P2AS_R2C1-010400039010_01_P001	1	1	0	0	1
-67.44454194	66.5750384	33	19AUG04163708-P2AS_R2C1-010400039010_01_P001	1	1	0	0	1
-67.44443443	66.5750255	34	19AUG04163708-P2AS_R2C1-010400039010_01_P001	1	1	0	0	1
-67.45247111	66.57478128	35	19AUG04163708-P2AS_R2C1-010400039010_01_P001	1	1	0	0	1
-67.45240839	66.57473164	36	19AUG04163708-P2AS_R2C1-010400039010_01_P001	1	1	0	0	1
-67.45245629	66.57471267	37	19AUG04163708-P2AS_R2C1-010400039010_01_P001	1	1	0	0	1
-67.45336727	66.57478251	38	19AUG04163708-P2AS_R2C1-010400039010_01_P001	1	1	0	0	1
-67.45162764	66.57396918	39	19AUG04163708-P2AS_R2C1-010400039010_01_P001	1	1	0	0	1
-67.44320257	66.57429824	40	19AUG04163708-P2AS_R2C1-010400039010_01_P001	1	1	0	0	1
-67.42210217	66.57336518	41	19AUG04163708-P2AS_R2C1-010400039010_01_P001	1	1	0	0	1
-67.42198444	66.57334624	42	19AUG04163708-P2AS_R2C1-010400039010_01_P001	1	1	0	0	1
-67.42191456	66.57344358	43	19AUG04163708-P2AS_R2C1-010400039010_01_P001	1	1	0	0	1
-67.42080933	66.57309057	44	19AUG04163708-P2AS_R2C1-010400039010_01_P001	1	1	0	0	1
-67.42077852	66.5730742	45	19AUG04163708-P2AS_R2C1-010400039010_01_P001	1	0	0	1	1
-67.42079	66.57306079	46	19AUG04163708-P2AS_R2C1-010400039010_01_P001	1	1	0	0	1
-67.43501966	66.57307156	47	19AUG04163708-P2AS_R2C1-010400039010_01_P001	1	1	0	0	1
-67.44252624	66.57214556	48	19AUG04163708-P2AS_R2C1-010400039010_01_P001	1	1	0	0	1
-67.44246201	66.57215422	49	19AUG04163708-P2AS_R2C1-010400039010_01_P001	1	1	0	0	1
-67.44258869	66.57203039	50	19AUG04163708-P2AS_R2C1-010400039010_01_P001	1	0	0	1	1
-67.44265824	66.57203869	51	19AUG04163708-P2AS_R2C1-010400039010_01_P001	1	1	0	0	1
-67.41038365	66.57175886	52	19AUG04163708-P2AS_R2C1-010400039010_01_P001	1	1	0	0	1
-67.45015247	66.57133534	53	19AUG04163708-P2AS_R2C1-010400039010_01_P001	1	1	0	0	1
-67.44957061	66.57106335	54	19AUG04163708-P2AS_R2C1-010400039010_01_P001	1	1	0	0	1
-67.44916946	66.57102642	55	19AUG04163708-P2AS_R2C1-010400039010_01_P001	1	1	0	0	1
-67.44808138	66.57078576	56	19AUG04163708-P2AS_R2C1-010400039010_01_P001	1	1	0	0	1
-67.44811547	66.57071595	57	19AUG04163708-P2AS_R2C1-010400039010_01_P001	1	1	0	0	1
-67.40287648	66.56871126	58	19AUG04163708-P2AS_R2C1-010400039010_01_P001	1	0	0	1	1
-67.40291118	66.56869977	59	19AUG04163708-P2AS_R2C1-010400039010_01_P001	1	1	0	0	1
-67.402859	66.56868571	60	19AUG04163708-P2AS_R2C1-010400039010_01_P001	1	0	0	1	1
-67.41939195	66.56936626	61	19AUG04163708-P2AS_R2C1-010400039010_01_P001	1	1	0	0	1
-67.44575686	66.56887499	62	19AUG04163708-P2AS_R2C1-010400039010_01_P001	1	1	0	0	1
-67.44543091	66.56882443	63	19AUG04163708-P2AS_R2C1-010400039010_01_P001	1	1	0	0	1
-67.43993359	66.56855769	64	19AUG04163708-P2AS_R2C1-010400039010_01_P001	1	1	0	0	1
-67.43570196	66.56884517	65	19AUG04163708-P2AS_R2C1-010400039010_01_P001	1	1	0	0	1
-67.44700507	66.56750292	66	19AUG04163708-P2AS_R2C1-010400039010_01_P001	1	1	0	0	1
-67.44696423	66.56751097	67	19AUG04163708-P2AS_R2C1-010400039010_01_P001	1	1	0	0	1
-67.44693107	66.56749795	68	19AUG04163708-P2AS_R2C1-010400039010_01_P001	1	1	0	0	1
-67.45912649	66.56759713	69	19AUG04163708-P2AS_R2C1-010400039010_01_P001	1	1	0	0	1
-67.40720833	66.56302635	70	19AUG04163708-P2AS_R2C1-010400039010_01_P001	1	1	0	0	1
-67.40703309	66.56307781	71	19AUG04163708-P2AS_R2C1-010400039010_01_P001	1	1	0	0	1
-67.40708816	66.56314599	72	19AUG04163708-P2AS_R2C1-010400039010_01_P001	1	1	0	0	1
-67.4593606	66.56243684	73	19AUG04163708-P2AS_R2C1-010400039010_01_P001	1	1	0	0	1
-67.45886247	66.56235673	74	19AUG04163708-P2AS_R2C1-010400039010_01_P001	1	1	0	0	1
-67.40207274	66.5775485	75	19AUG04163708-P2AS_R2C1-010400039010_01_P001	1	1	0	0	1
-67.41180682	66.57660606	76	19AUG04163708-P2AS_R2C1-010400039010_01_P001	1	1	0	0	1
-67.40484132	66.57597839	77	19AUG04163708-P2AS_R2C1-010400039010_01_P001	1	1	0	0	1
-67.41467461	66.57106126	78	19AUG04163708-P2AS_R2C1-010400039010_01_P001	1	1	0	0	1
-67.40774758	66.55967394	79	19AUG04163708-P2AS_R2C1-010400039010_01_P001	1	1	0	0	1
-67.40773573	66.57449345	80	19AUG04163708-P2AS_R2C1-010400039010_01_P001	1	1	0	0	1
-67.4078422	66.57450163	81	19AUG04163708-P2AS_R2C1-010400039010_01_P001	1	1	0	0	1
-67.44226875	66.57184972	82	19AUG04163708-P2AS_R2C1-010400039010_01_P001	0	0	1	1	1
-67.44180439	66.57170312	83	19AUG04163708-P2AS_R2C1-010400039010_01_P001	0	0	1	1	1
-67.44338837	66.5713833	84	19AUG04163708-P2AS_R2C1-010400039010_01_P001	0	0	1	1	1
-67.4475035	66.57034899	85	19AUG04163708-P2AS_R2C1-010400039010_01_P001	0	0	1	1	1
-67.4527687	66.56684823	86	19AUG04163708-P2AS_R2C1-010400039010_01_P001	0	1	1	0	1
-67.44417861	66.56508721	87	19AUG04163708-P2AS_R2C1-010400039010_01_P001	0	0	1	1	1
-67.45118834	66.56459865	88	19AUG04163708-P2AS_R2C1-010400039010_01_P001	0	1	1	0	1
-67.42928728	66.56302508	89	19AUG04163708-P2AS_R2C1-010400039010_01_P001	0	0	1	0	1
-67.45776801	66.56227497	90	19AUG04163708-P2AS_R2C1-010400039010_01_P001	0	0	1	0	1
-67.44633913	66.55851129	91	19AUG04163708-P2AS_R2C1-010400039010_01_P001	0	1	1	0	1
-67.40005286	66.57738254	92	19AUG04163708-P2AS_R2C1-010400039010_01_P001	0	0	1	1	1
-67.43471559	66.57464298	93	19AUG04163708-P2AS_R2C1-010400039010_01_P001	0	0	1	1	1
-67.40817736	66.55897783	94	19AUG04163708-P2AS_R2C1-010400039010_01_P001	0	0	1	1	1
-67.40696028	66.55872889	95	19AUG04163708-P2AS_R2C1-010400039010_01_P001	0	0	1	1	1
-67.40909156	66.55805973	96	19AUG04163708-P2AS_R2C1-010400039010_01_P001	0	0	1	1	1
-67.41555834	66.56996208	97	19AUG04163708-P2AS_R2C1-010400039010_01_P001	0	0	1	1	1
-67.43565473	66.5735781	98	19AUG04163708-P2AS_R2C1-010400039010_01_P001	0	0	1	1	1
-67.36448557	66.57527641	99	19AUG04163708-P2AS_R2C1-010400039010_01_P001	1	1	0	0	1
-67.36430337	66.57523732	100	19AUG04163708-P2AS_R2C1-010400039010_01_P001	1	0	0	1	1
-67.36433168	66.57522663	101	19AUG04163708-P2AS_R2C1-010400039010_01_P001	1	1	0	0	1
-67.3662854	66.57222616	102	19AUG04163708-P2AS_R2C1-010400039010_01_P001	1	1	0	0	1
-67.36650896	66.57208818	103	19AUG04163708-P2AS_R2C1-010400039010_01_P001	1	1	0	0	1
-67.36646769	66.57190856	104	19AUG04163708-P2AS_R2C1-010400039010_01_P001	1	1	0	0	1
-67.37965671	66.56885341	105	19AUG04163708-P2AS_R2C1-010400039010_01_P001	1	1	0	0	1
-67.34850321	66.56453051	106	19AUG04163708-P2AS_R2C1-010400039010_01_P001	1	1	0	0	1
-67.34858567	66.56450348	107	19AUG04163708-P2AS_R2C1-010400039010_01_P001	1	1	0	0	1
-67.38615463	66.56439923	108	19AUG04163708-P2AS_R2C1-010400039010_01_P001	1	1	0	0	1
-67.38604893	66.56442518	109	19AUG04163708-P2AS_R2C1-010400039010_01_P001	1	0	0	1	1
-67.34876189	66.56441055	110	19AUG04163708-P2AS_R2C1-010400039010_01_P001	1	1	0	0	1
-67.34860899	66.56437936	111	19AUG04163708-P2AS_R2C1-010400039010_01_P001	1	1	0	0	1
-67.34860441	66.56435226	112	19AUG04163708-P2AS_R2C1-010400039010_01_P001	1	1	0	0	1
-67.34797873	66.5644395	113	19AUG04163708-P2AS_R2C1-010400039010_01_P001	1	1	0	0	1
-67.35676608	66.55979095	114	19AUG04163708-P2AS_R2C1-010400039010_01_P001	1	1	0	0	1
-67.36344677	66.5588715	115	19AUG04163708-P2AS_R2C1-010400039010_01_P001	1	1	0	0	1
-67.36592917	66.55562299	116	19AUG04163708-P2AS_R2C1-010400039010_01_P001	1	1	0	0	1
-67.34572884	66.59010816	117	19AUG04163708-P2AS_R2C1-010400039010_01_P001	1	1	0	0	1
-67.34605966	66.58919372	118	19AUG04163708-P2AS_R2C1-010400039010_01_P001	1	1	0	0	1
-67.34670862	66.58892587	119	19AUG04163708-P2AS_R2C1-010400039010_01_P001	1	0	0	1	1
-67.3466684	66.58892375	120	19AUG04163708-P2AS_R2C1-010400039010_01_P001	1	1	0	0	1
-67.34658352	66.58892201	121	19AUG04163708-P2AS_R2C1-010400039010_01_P001	1	1	0	0	1
-67.34655629	66.58869267	122	19AUG04163708-P2AS_R2C1-010400039010_01_P001	1	1	0	0	1
-67.34650467	66.58867015	123	19AUG04163708-P2AS_R2C1-010400039010_01_P001	1	0	0	1	1
-67.34703415	66.58595156	124	19AUG04163708-P2AS_R2C1-010400039010_01_P001	1	1	0	0	1
-67.38582515	66.58678054	125	19AUG04163708-P2AS_R2C1-010400039010_01_P001	1	1	0	0	1
-67.38581513	66.58670606	126	19AUG04163708-P2AS_R2C1-010400039010_01_P001	1	1	0	0	1
-67.38578668	66.58519875	127	19AUG04163708-P2AS_R2C1-010400039010_01_P001	1	1	0	0	1
-67.34891016	66.58403701	128	19AUG04163708-P2AS_R2C1-010400039010_01_P001	1	1	0	0	1
-67.35367113	66.58466602	129	19AUG04163708-P2AS_R2C1-010400039010_01_P001	1	0	0	1	1
-67.35287661	66.58405588	130	19AUG04163708-P2AS_R2C1-010400039010_01_P001	1	1	0	0	1
-67.35368603	66.58396042	131	19AUG04163708-P2AS_R2C1-010400039010_01_P001	1	1	0	0	1
-67.35375069	66.58394673	132	19AUG04163708-P2AS_R2C1-010400039010_01_P001	1	1	0	0	1
-67.35365851	66.58392716	133	19AUG04163708-P2AS_R2C1-010400039010_01_P001	1	1	0	0	1
-67.35544874	66.58406765	134	19AUG04163708-P2AS_R2C1-010400039010_01_P001	1	1	0	0	1
-67.35622598	66.58381631	135	19AUG04163708-P2AS_R2C1-010400039010_01_P001	1	1	0	0	1
-67.37184677	66.58425641	136	19AUG04163708-P2AS_R2C1-010400039010_01_P001	1	1	0	0	1
-67.37183614	66.58422418	137	19AUG04163708-P2AS_R2C1-010400039010_01_P001	1	0	0	1	1
-67.37169926	66.58414077	138	19AUG04163708-P2AS_R2C1-010400039010_01_P001	1	1	0	0	1
-67.38634292	66.5843715	139	19AUG04163708-P2AS_R2C1-010400039010_01_P001	1	1	0	0	1
-67.37201461	66.58347886	140	19AUG04163708-P2AS_R2C1-010400039010_01_P001	1	1	0	0	1
-67.37200958	66.58345852	141	19AUG04163708-P2AS_R2C1-010400039010_01_P001	1	1	0	0	1
-67.36327311	66.58314111	142	19AUG04163708-P2AS_R2C1-010400039010_01_P001	1	1	0	0	1
-67.36319534	66.58312847	143	19AUG04163708-P2AS_R2C1-010400039010_01_P001	1	1	0	0	1
-67.35981228	66.58347856	144	19AUG04163708-P2AS_R2C1-010400039010_01_P001	1	1	0	0	1
-67.34413578	66.58208325	145	19AUG04163708-P2AS_R2C1-010400039010_01_P001	1	1	0	0	1
-67.36147655	66.58271074	146	19AUG04163708-P2AS_R2C1-010400039010_01_P001	1	1	0	0	1
-67.36139122	66.58274788	147	19AUG04163708-P2AS_R2C1-010400039010_01_P001	1	1	0	0	1
-67.36134647	66.58271783	148	19AUG04163708-P2AS_R2C1-010400039010_01_P001	1	1	0	0	1
-67.36140954	66.58269567	149	19AUG04163708-P2AS_R2C1-010400039010_01_P001	1	1	0	0	1
-67.3613416	66.58269496	150	19AUG04163708-P2AS_R2C1-010400039010_01_P001	1	1	0	0	1
-67.36126204	66.58267722	151	19AUG04163708-P2AS_R2C1-010400039010_01_P001	1	1	0	0	1
-67.36123278	66.58270228	152	19AUG04163708-P2AS_R2C1-010400039010_01_P001	1	1	0	0	1
-67.36122317	66.58271908	153	19AUG04163708-P2AS_R2C1-010400039010_01_P001	1	1	0	0	1
-67.36122542	66.58274953	154	19AUG04163708-P2AS_R2C1-010400039010_01_P001	1	1	0	0	1
-67.36124933	66.58277345	155	19AUG04163708-P2AS_R2C1-010400039010_01_P001	1	1	0	0	1
-67.36095377	66.58268076	156	19AUG04163708-P2AS_R2C1-010400039010_01_P001	1	1	0	0	1
-67.36096381	66.58262509	157	19AUG04163708-P2AS_R2C1-010400039010_01_P001	1	1	0	0	1
-67.37257804	66.58282375	158	19AUG04163708-P2AS_R2C1-010400039010_01_P001	1	1	0	0	1
-67.37263543	66.58282349	159	19AUG04163708-P2AS_R2C1-010400039010_01_P001	1	1	0	0	1
-67.37266013	66.58283558	160	19AUG04163708-P2AS_R2C1-010400039010_01_P001	1	1	0	0	1
-67.37268079	66.58281213	161	19AUG04163708-P2AS_R2C1-010400039010_01_P001	1	1	0	0	1
-67.40405539	66.58181503	162	19AUG04163708-P2AS_R2C1-010400039010_01_P001	1	1	0	0	1
-67.40401294	66.5818146	163	19AUG04163708-P2AS_R2C1-010400039010_01_P001	1	1	0	0	1
-67.39030114	66.58156802	164	19AUG04163708-P2AS_R2C1-010400039010_01_P001	1	1	0	0	1
-67.39029555	66.58155613	165	19AUG04163708-P2AS_R2C1-010400039010_01_P001	1	1	0	0	1
-67.3767371	66.58202161	166	19AUG04163708-P2AS_R2C1-010400039010_01_P001	1	1	0	0	1
-67.3491673	66.58195878	167	19AUG04163708-P2AS_R2C1-010400039010_01_P001	1	1	0	0	1
-67.34438596	66.58185176	168	19AUG04163708-P2AS_R2C1-010400039010_01_P001	1	1	0	0	1
-67.34370682	66.58187333	169	19AUG04163708-P2AS_R2C1-010400039010_01_P001	1	1	0	0	1
-67.34385562	66.58180813	170	19AUG04163708-P2AS_R2C1-010400039010_01_P001	1	1	0	0	1
-67.34372991	66.58175017	171	19AUG04163708-P2AS_R2C1-010400039010_01_P001	1	1	0	0	1
-67.34358854	66.58170388	172	19AUG04163708-P2AS_R2C1-010400039010_01_P001	1	1	0	0	1
-67.34361927	66.581689	173	19AUG04163708-P2AS_R2C1-010400039010_01_P001	1	1	0	0	1
-67.3435405	66.58169154	174	19AUG04163708-P2AS_R2C1-010400039010_01_P001	1	1	0	0	1
-67.34352985	66.58162804	175	19AUG04163708-P2AS_R2C1-010400039010_01_P001	1	1	0	0	1
-67.34340721	66.58168337	176	19AUG04163708-P2AS_R2C1-010400039010_01_P001	1	1	0	0	1
-67.34340184	66.58170022	177	19AUG04163708-P2AS_R2C1-010400039010_01_P001	1	1	0	0	1
-67.37434856	66.58079921	178	19AUG04163708-P2AS_R2C1-010400039010_01_P001	1	1	0	0	1
-67.37439561	66.58076166	179	19AUG04163708-P2AS_R2C1-010400039010_01_P001	1	1	0	0	1
-67.40309122	66.58101748	180	19AUG04163708-P2AS_R2C1-010400039010_01_P001	1	1	0	0	1
-67.40352394	66.58082918	181	19AUG04163708-P2AS_R2C1-010400039010_01_P001	1	1	0	0	1
-67.4038624	66.58081826	182	19AUG04163708-P2AS_R2C1-010400039010_01_P001	1	1	0	0	1
-67.40328812	66.58073042	183	19AUG04163708-P2AS_R2C1-010400039010_01_P001	1	1	0	0	1
-67.40309249	66.5807335	184	19AUG04163708-P2AS_R2C1-010400039010_01_P001	1	1	0	0	1
-67.40342897	66.58065409	185	19AUG04163708-P2AS_R2C1-010400039010_01_P001	1	1	0	0	1
-67.40452114	66.58055026	186	19AUG04163708-P2AS_R2C1-010400039010_01_P001	1	1	0	0	1
-67.404582	66.5805289	187	19AUG04163708-P2AS_R2C1-010400039010_01_P001	1	1	0	0	1
-67.38911306	66.58049593	188	19AUG04163708-P2AS_R2C1-010400039010_01_P001	1	1	0	0	1
-67.38891865	66.58044744	189	19AUG04163708-P2AS_R2C1-010400039010_01_P001	1	0	0	1	1
-67.38881489	66.58044215	190	19AUG04163708-P2AS_R2C1-010400039010_01_P001	1	0	0	1	1
-67.38872607	66.58043617	191	19AUG04163708-P2AS_R2C1-010400039010_01_P001	1	0	0	0	1
-67.38868258	66.58041882	192	19AUG04163708-P2AS_R2C1-010400039010_01_P001	1	1	0	0	1
-67.38872793	66.58040745	193	19AUG04163708-P2AS_R2C1-010400039010_01_P001	1	0	0	0	1
-67.38243779	66.57965978	194	19AUG04163708-P2AS_R2C1-010400039010_01_P001	1	1	0	0	1
-67.38236986	66.57965908	195	19AUG04163708-P2AS_R2C1-010400039010_01_P001	1	1	0	0	1
-67.38240151	66.57962983	196	19AUG04163708-P2AS_R2C1-010400039010_01_P001	1	1	0	0	1
-67.3798317	66.57965486	197	19AUG04163708-P2AS_R2C1-010400039010_01_P001	1	1	0	0	1
-67.37947107	66.57961481	198	19AUG04163708-P2AS_R2C1-010400039010_01_P001	1	1	0	0	1
-67.37942818	66.57962113	199	19AUG04163708-P2AS_R2C1-010400039010_01_P001	1	1	0	0	1
-67.37944853	66.57976502	200	19AUG04163708-P2AS_R2C1-010400039010_01_P001	1	1	0	0	1
-67.37686958	66.58031987	201	19AUG04163708-P2AS_R2C1-010400039010_01_P001	1	1	0	0	1
-67.37547043	66.57949652	202	19AUG04163708-P2AS_R2C1-010400039010_01_P001	1	1	0	0	1
-67.3754533	66.57953099	203	19AUG04163708-P2AS_R2C1-010400039010_01_P001	1	1	0	0	1
-67.37548776	66.57952374	204	19AUG04163708-P2AS_R2C1-010400039010_01_P001	1	1	0	0	1
-67.37523537	66.57958282	205	19AUG04163708-P2AS_R2C1-010400039010_01_P001	1	1	0	0	1
-67.37515751	66.57960399	206	19AUG04163708-P2AS_R2C1-010400039010_01_P001	1	1	0	0	1
-67.36867983	66.57914966	207	19AUG04163708-P2AS_R2C1-010400039010_01_P001	1	1	0	0	1
-67.36879131	66.57913391	208	19AUG04163708-P2AS_R2C1-010400039010_01_P001	1	0	0	1	1
-67.37094869	66.57878951	209	19AUG04163708-P2AS_R2C1-010400039010_01_P001	1	1	0	0	1
-67.38669913	66.57800563	210	19AUG04163708-P2AS_R2C1-010400039010_01_P001	1	1	0	0	1
-67.38103608	66.57858035	211	19AUG04163708-P2AS_R2C1-010400039010_01_P001	1	1	0	0	1
-67.38099695	66.57862644	212	19AUG04163708-P2AS_R2C1-010400039010_01_P001	1	1	0	0	1
-67.38054024	66.57826842	213	19AUG04163708-P2AS_R2C1-010400039010_01_P001	1	1	0	0	1
-67.37192082	66.57800678	214	19AUG04163708-P2AS_R2C1-010400039010_01_P001	1	1	0	0	1
-67.37183261	66.5779915	215	19AUG04163708-P2AS_R2C1-010400039010_01_P001	1	1	0	0	1
-67.37195201	66.57795216	216	19AUG04163708-P2AS_R2C1-010400039010_01_P001	1	0	0	0	1
-67.36663195	66.57777938	217	19AUG04163708-P2AS_R2C1-010400039010_01_P001	1	1	0	0	1
-67.36286515	66.57845264	218	19AUG04163708-P2AS_R2C1-010400039010_01_P001	1	1	0	0	1
-67.36209386	66.57852065	219	19AUG04163708-P2AS_R2C1-010400039010_01_P001	1	1	0	0	1
-67.36195542	66.5783975	220	19AUG04163708-P2AS_R2C1-010400039010_01_P001	1	1	0	0	1
-67.36173692	66.57819997	221	19AUG04163708-P2AS_R2C1-010400039010_01_P001	1	1	0	0	1
-67.36535465	66.57727415	222	19AUG04163708-P2AS_R2C1-010400039010_01_P001	1	1	0	0	1
-67.36392608	66.5767124	223	19AUG04163708-P2AS_R2C1-010400039010_01_P001	1	1	0	0	1
-67.36379337	66.57679216	224	19AUG04163708-P2AS_R2C1-010400039010_01_P001	1	1	0	0	1
-67.36573026	66.57753756	225	19AUG04163708-P2AS_R2C1-010400039010_01_P001	1	1	0	0	1
-67.36611138	66.57755589	226	19AUG04163708-P2AS_R2C1-010400039010_01_P001	1	1	0	0	1
-67.36606347	66.57757399	227	19AUG04163708-P2AS_R2C1-010400039010_01_P001	1	1	0	0	1
-67.36619586	66.57759565	228	19AUG04163708-P2AS_R2C1-010400039010_01_P001	1	1	0	0	1
-67.36650683	66.57761494	229	19AUG04163708-P2AS_R2C1-010400039010_01_P001	1	1	0	0	1
-67.39172287	66.5772458	230	19AUG04163708-P2AS_R2C1-010400039010_01_P001	1	1	0	0	1
-67.39199583	66.57703223	231	19AUG04163708-P2AS_R2C1-010400039010_01_P001	1	1	0	0	1
-67.39454294	66.57781394	232	19AUG04163708-P2AS_R2C1-010400039010_01_P001	1	1	0	0	1
-67.39445247	66.57783329	233	19AUG04163708-P2AS_R2C1-010400039010_01_P001	1	1	0	0	1
-67.40005184	66.5776623	234	19AUG04163708-P2AS_R2C1-010400039010_01_P001	1	1	0	0	1
-67.3861886	66.57615358	235	19AUG04163708-P2AS_R2C1-010400039010_01_P001	1	1	0	0	1
-67.38621782	66.56105622	236	19AUG04163708-P2AS_R2C1-010400039010_01_P001	1	1	0	0	1
-67.38612051	66.56109098	237	19AUG04163708-P2AS_R2C1-010400039010_01_P001	1	0	0	1	1
-67.33791639	66.5617823	238	19AUG04163708-P2AS_R2C1-010400039010_01_P001	1	1	0	0	1
-67.34612917	66.56127218	239	19AUG04163708-P2AS_R2C1-010400039010_01_P001	1	1	0	0	1
-67.39642794	66.58252977	240	19AUG04163708-P2AS_R2C1-010400039010_01_P001	1	1	0	0	1
-67.38677373	66.57093375	241	19AUG04163708-P2AS_R2C1-010400039010_01_P001	0	1	1	0	1
-67.38917648	66.56796849	242	19AUG04163708-P2AS_R2C1-010400039010_01_P001	0	0	1	0	1
-67.38861984	66.56787571	243	19AUG04163708-P2AS_R2C1-010400039010_01_P001	0	0	1	1	1
-67.38741579	66.56750244	244	19AUG04163708-P2AS_R2C1-010400039010_01_P001	0	0	1	1	1
-67.38826882	66.56747739	245	19AUG04163708-P2AS_R2C1-010400039010_01_P001	0	0	1	1	1
-67.38524215	66.56391989	246	19AUG04163708-P2AS_R2C1-010400039010_01_P001	0	0	1	1	1
-67.39495433	66.58430009	247	19AUG04163708-P2AS_R2C1-010400039010_01_P001	0	1	1	0	1
-67.37087782	66.58280103	248	19AUG04163708-P2AS_R2C1-010400039010_01_P001	0	1	1	0	1
-67.37098113	66.58281309	249	19AUG04163708-P2AS_R2C1-010400039010_01_P001	0	0	1	1	1
-67.37280415	66.58245335	250	19AUG04163708-P2AS_R2C1-010400039010_01_P001	0	0	1	1	1
-67.35772698	66.57774473	251	19AUG04163708-P2AS_R2C1-010400039010_01_P001	0	0	1	0	1
-67.33668201	66.57713673	252	19AUG04163708-P2AS_R2C1-010400039010_01_P001	0	0	1	1	1
-67.36303231	66.5773184	253	19AUG04163708-P2AS_R2C1-010400039010_01_P001	0	0	1	1	1
-67.35016644	66.57628606	254	19AUG06160143-P2AS_R1C1-010400039010_02_P001	0	0	1	1	1
-67.34358141	66.57585762	255	19AUG06160143-P2AS_R1C1-010400039010_02_P001	0	0	1	1	1
-67.37630752	66.55876154	256	19AUG04163708-P2AS_R2C1-010400039010_01_P001	0	1	1	0	1
-67.37847314	66.56307483	257	19AUG04163708-P2AS_R2C1-010400039010_01_P001	0	0	1	1	1
-67.37844112	66.56307976	258	19AUG04163708-P2AS_R2C1-010400039010_01_P001	0	0	1	1	1
-67.34442359	66.57635942	259	19AUG06160143-P2AS_R1C1-010400039010_02_P001	0	0	1	1	1
-67.39640956	66.58254173	260	19AUG04163708-P2AS_R2C1-010400039010_01_P001	0	0	1	1	1
-67.39629101	66.5825223	261	19AUG04163708-P2AS_R2C1-010400039010_01_P001	0	0	1	1	1
-67.36422406	66.57509811	262	19AUG04163708-P2AS_R2C1-010400039010_01_P001	0	0	1	1	1
-67.45308519	66.55051034	263	19AUG04163708-P2AS_R2C2-010400039010_01_P001	1	0	0	1	1
-67.46804974	66.58123366	264	19AUG04163708-P2AS_R1C1-010400039010_01_P001	1	1	0	0	1
-67.47417222	66.57987572	265	19AUG04163708-P2AS_R1C1-010400039010_01_P001	1	1	0	0	1
-67.47436356	66.57984539	266	19AUG04163708-P2AS_R1C1-010400039010_01_P001	1	1	0	0	1
-67.47187418	66.57989063	267	19AUG04163708-P2AS_R1C1-010400039010_01_P001	1	1	0	0	1
-67.47658193	66.58000079	268	19AUG04163708-P2AS_R1C1-010400039010_01_P001	1	1	0	0	1
-67.47782445	66.57984004	269	19AUG04163708-P2AS_R1C1-010400039010_01_P001	1	1	0	0	1
-67.47884793	66.57936205	270	19AUG04163708-P2AS_R1C1-010400039010_01_P001	1	1	0	0	1
-67.48027812	66.57910823	271	19AUG04163708-P2AS_R1C1-010400039010_01_P001	1	1	0	0	1
-67.47761491	66.5785174	272	19AUG04163708-P2AS_R1C1-010400039010_01_P001	1	1	0	0	1
-67.47743877	66.57819592	273	19AUG04163708-P2AS_R1C1-010400039010_01_P001	1	1	0	0	1
-67.49923895	66.57748435	274	19AUG04163708-P2AS_R1C1-010400039010_01_P001	1	1	0	0	1
-67.48110668	66.5754454	275	19AUG04163708-P2AS_R1C1-010400039010_01_P001	1	1	0	0	1
-67.45926988	66.57463778	276	19AUG04163708-P2AS_R1C1-010400039010_01_P001	1	1	0	0	1
-67.45931785	66.57461962	277	19AUG04163708-P2AS_R1C1-010400039010_01_P001	1	1	0	0	1
-67.48331055	66.5741241	278	19AUG04163708-P2AS_R1C1-010400039010_01_P001	1	1	0	0	1
-67.47508496	66.57364283	279	19AUG04163708-P2AS_R1C1-010400039010_01_P001	1	1	0	0	1
-67.47449228	66.57365909	280	19AUG04163708-P2AS_R1C1-010400039010_01_P001	1	1	0	0	1
-67.47438372	66.57369361	281	19AUG04163708-P2AS_R1C1-010400039010_01_P001	1	1	0	0	1
-67.45913946	66.57320576	282	19AUG04163708-P2AS_R1C1-010400039010_01_P001	1	1	0	0	1
-67.459044	66.5731667	283	19AUG04163708-P2AS_R1C1-010400039010_01_P001	1	1	0	0	1
-67.46010738	66.57314496	284	19AUG04163708-P2AS_R1C1-010400039010_01_P001	1	1	0	0	1
-67.48746371	66.57219176	285	19AUG04163708-P2AS_R1C1-010400039010_01_P001	1	1	0	0	1
-67.47227176	66.57193779	286	19AUG04163708-P2AS_R1C1-010400039010_01_P001	1	1	0	0	1
-67.47227278	66.57185224	287	19AUG04163708-P2AS_R1C1-010400039010_01_P001	1	1	0	0	1
-67.47508431	66.57146877	288	19AUG04163708-P2AS_R1C1-010400039010_01_P001	1	1	0	0	1
-67.4750381	66.57142427	289	19AUG04163708-P2AS_R1C1-010400039010_01_P001	1	1	0	0	1
-67.47219937	66.57135005	290	19AUG04163708-P2AS_R1C1-010400039010_01_P001	1	0	0	1	1
-67.47503919	66.57107697	291	19AUG04163708-P2AS_R1C1-010400039010_01_P001	1	1	0	0	1
-67.5019441	66.57131423	292	19AUG04163708-P2AS_R1C1-010400039010_01_P001	1	1	0	0	1
-67.46421472	66.5669879	293	19AUG04163708-P2AS_R1C1-010400039010_01_P001	1	1	0	0	1
-67.46018117	66.56754132	294	19AUG04163708-P2AS_R1C1-010400039010_01_P001	1	1	0	0	1
-67.45999454	66.56753102	295	19AUG04163708-P2AS_R1C1-010400039010_01_P001	1	1	0	0	1
-67.45949119	66.56765313	296	19AUG04163708-P2AS_R1C1-010400039010_01_P001	1	1	0	0	1
-67.45945052	66.56765697	297	19AUG04163708-P2AS_R1C1-010400039010_01_P001	1	1	0	0	1
-67.45941355	66.56763543	298	19AUG04163708-P2AS_R1C1-010400039010_01_P001	1	1	0	0	1
-67.45946351	66.56761898	299	19AUG04163708-P2AS_R1C1-010400039010_01_P001	1	1	0	0	1
-67.46315415	66.55953517	300	19AUG04163708-P2AS_R1C1-010400039010_01_P001	1	1	0	0	1
-67.46722259	66.56713369	301	19AUG04163708-P2AS_R1C1-010400039010_01_P001	1	1	0	0	1
-67.45980671	66.56757491	302	19AUG04163708-P2AS_R1C1-010400039010_01_P001	0	0	1	1	1
-67.54523448	66.56122122	303	19AUG04163708-P2AS_R1C1-010400039010_01_P001	0	1	1	0	1
-67.25626918	66.52418689	304	19AUG06160143-P2AS_R1C1-010400039010_02_P001	1	1	0	0	2
-67.25616892	66.52418788	305	19AUG06160143-P2AS_R1C1-010400039010_02_P001	1	1	0	0	2
-67.24690156	66.52516799	306	19AUG06160143-P2AS_R1C1-010400039010_02_P001	1	1	0	0	2
-67.2468634	66.52517623	307	19AUG06160143-P2AS_R1C1-010400039010_02_P001	1	1	0	0	2
-67.24678878	66.52519669	308	19AUG06160143-P2AS_R1C1-010400039010_02_P001	1	1	0	0	2
-67.24680653	66.52516928	309	19AUG06160143-P2AS_R1C1-010400039010_02_P001	1	1	0	0	2
-67.24684359	66.52515814	310	19AUG06160143-P2AS_R1C1-010400039010_02_P001	1	1	0	0	2
-67.24687507	66.52515087	311	19AUG06160143-P2AS_R1C1-010400039010_02_P001	1	1	0	0	2
-67.28537604	66.54434058	312	19AUG06160143-P2AS_R1C1-010400039010_02_P001	0	0	1	1	2
-67.29095393	66.54215656	313	19AUG06160143-P2AS_R1C1-010400039010_02_P001	0	0	0	1	2
-67.25597065	66.54107244	314	19AUG06160143-P2AS_R1C1-010400039010_02_P001	0	0	1	1	2
-67.2908493	66.53866818	315	19AUG06160143-P2AS_R1C1-010400039010_02_P001	0	0	1	1	2
-67.29167239	66.53840871	316	19AUG06160143-P2AS_R1C1-010400039010_02_P001	0	0	1	1	2
-67.30444539	66.54269308	317	19AUG06160143-P2AS_R1C1-010400039010_02_P001	0	0	0	1	2
-67.30706655	66.55458917	318	19AUG06160143-P2AS_R1C1-010400039010_02_P001	0	0	1	1	2
-67.31610107	66.55674319	319	19AUG06160143-P2AS_R1C1-010400039010_02_P001	0	0	1	1	2
-67.31595082	66.55672002	320	19AUG06160143-P2AS_R1C1-010400039010_02_P001	0	0	1	1	2
-67.89503848	66.61969312	321	19AUG09161644-P2AS_R1C1-010400039010_03_P001	1	1	0	0	2
-67.89515857	66.61934217	322	19AUG09161644-P2AS_R1C1-010400039010_03_P001	1	1	0	0	2
-67.89432109	66.61716499	323	19AUG09161644-P2AS_R1C1-010400039010_03_P001	1	1	0	0	2
-67.8942983	66.61715044	324	19AUG09161644-P2AS_R1C1-010400039010_03_P001	1	1	0	0	2
-67.89343086	66.61691318	325	19AUG09161644-P2AS_R1C1-010400039010_03_P001	1	1	0	0	2
-67.89340187	66.61689435	326	19AUG09161644-P2AS_R1C1-010400039010_03_P001	1	1	0	0	2
-67.34850321	66.56453051	327	19AUG04163708-P2AS_R2C1-010400039010_01_P001	1	1	0	0	3
-67.34858567	66.56450348	328	19AUG04163708-P2AS_R2C1-010400039010_01_P001	1	1	0	0	3
-67.34876189	66.56441055	329	19AUG04163708-P2AS_R2C1-010400039010_01_P001	1	1	0	0	3
-67.34860899	66.56437936	330	19AUG04163708-P2AS_R2C1-010400039010_01_P001	1	1	0	0	3
-67.34860441	66.56435226	331	19AUG04163708-P2AS_R2C1-010400039010_01_P001	1	1	0	0	3
-67.34797873	66.5644395	332	19AUG04163708-P2AS_R2C1-010400039010_01_P001	1	1	0	0	3
-67.34572884	66.59010816	333	19AUG04163708-P2AS_R2C1-010400039010_01_P001	1	1	0	0	3
-67.34605966	66.58919372	334	19AUG04163708-P2AS_R2C1-010400039010_01_P001	1	1	0	0	3
-67.34670862	66.58892587	335	19AUG04163708-P2AS_R2C1-010400039010_01_P001	1	0	0	1	3
-67.3466684	66.58892375	336	19AUG04163708-P2AS_R2C1-010400039010_01_P001	1	1	0	0	3
-67.34658352	66.58892201	337	19AUG04163708-P2AS_R2C1-010400039010_01_P001	1	1	0	0	3
-67.34655629	66.58869267	338	19AUG04163708-P2AS_R2C1-010400039010_01_P001	1	1	0	0	3
-67.34650467	66.58867015	339	19AUG04163708-P2AS_R2C1-010400039010_01_P001	1	0	0	1	3
-67.34703415	66.58595156	340	19AUG04163708-P2AS_R2C1-010400039010_01_P001	1	1	0	0	3
-67.34891016	66.58403701	341	19AUG04163708-P2AS_R2C1-010400039010_01_P001	1	1	0	0	3
-67.35367113	66.58466602	342	19AUG04163708-P2AS_R2C1-010400039010_01_P001	1	0	0	1	3
-67.35287661	66.58405588	343	19AUG04163708-P2AS_R2C1-010400039010_01_P001	1	1	0	0	3
-67.35368603	66.58396042	344	19AUG04163708-P2AS_R2C1-010400039010_01_P001	1	1	0	0	3
-67.35375069	66.58394673	345	19AUG04163708-P2AS_R2C1-010400039010_01_P001	1	1	0	0	3
-67.35365851	66.58392716	346	19AUG04163708-P2AS_R2C1-010400039010_01_P001	1	1	0	0	3
-67.34413578	66.58208325	347	19AUG04163708-P2AS_R2C1-010400039010_01_P001	1	1	0	0	3
-67.3491673	66.58195878	348	19AUG04163708-P2AS_R2C1-010400039010_01_P001	1	1	0	0	3
-67.34438596	66.58185176	349	19AUG04163708-P2AS_R2C1-010400039010_01_P001	1	1	0	0	3
-67.34370682	66.58187333	350	19AUG04163708-P2AS_R2C1-010400039010_01_P001	1	1	0	0	3
-67.34385562	66.58180813	351	19AUG04163708-P2AS_R2C1-010400039010_01_P001	1	1	0	0	3
-67.34372991	66.58175017	352	19AUG04163708-P2AS_R2C1-010400039010_01_P001	1	1	0	0	3
-67.34358854	66.58170388	353	19AUG04163708-P2AS_R2C1-010400039010_01_P001	1	1	0	0	3
-67.34361927	66.581689	354	19AUG04163708-P2AS_R2C1-010400039010_01_P001	1	1	0	0	3
-67.3435405	66.58169154	355	19AUG04163708-P2AS_R2C1-010400039010_01_P001	1	1	0	0	3
-67.34352985	66.58162804	356	19AUG04163708-P2AS_R2C1-010400039010_01_P001	1	1	0	0	3
-67.34340721	66.58168337	357	19AUG04163708-P2AS_R2C1-010400039010_01_P001	1	1	0	0	3
-67.34340184	66.58170022	358	19AUG04163708-P2AS_R2C1-010400039010_01_P001	1	1	0	0	3
-67.33791639	66.5617823	359	19AUG04163708-P2AS_R2C1-010400039010_01_P001	1	1	0	0	3
-67.34612917	66.56127218	360	19AUG04163708-P2AS_R2C1-010400039010_01_P001	1	1	0	0	3
-67.33668201	66.57713673	361	19AUG04163708-P2AS_R2C1-010400039010_01_P001	0	0	1	1	3
-67.35016644	66.57628606	362	19AUG06160143-P2AS_R1C1-010400039010_02_P001	0	0	0	1	3
-67.34358141	66.57585762	363	19AUG06160143-P2AS_R1C1-010400039010_02_P001	0	0	0	1	3
-67.31484257	66.57164969	364	19AUG06160143-P2AS_R1C1-010400039010_02_P001	0	1	1	0	3
-67.31436423	66.57155517	365	19AUG06160143-P2AS_R1C1-010400039010_02_P001	0	1	1	0	3
-67.31454766	66.57144096	366	19AUG06160143-P2AS_R1C1-010400039010_02_P001	0	0	0	1	3
-67.34442359	66.57635942	367	19AUG06160143-P2AS_R1C1-010400039010_02_P001	0	0	0	1	3
-67.45881664	66.57463587	368	19AUG04163708-P2AS_R1C1-010400039010_01_P001	1	1	0	0	2
-67.45888342	66.57455436	369	19AUG04163708-P2AS_R1C1-010400039010_01_P001	1	1	0	0	2
-67.46075114	66.57178106	370	19AUG04163708-P2AS_R1C1-010400039010_01_P001	0	0	0	1	1
-67.41525038	66.55898093	371	19AUG04163708-P2AS_R2C1-010400039010_01_P001	0	0	0	1	1
-67.41042915	66.57452286	372	19AUG04163708-P2AS_R2C1-010400039010_01_P001	0	0	0	1	1
-67.40352568	66.57454039	373	19AUG04163708-P2AS_R2C1-010400039010_01_P001	0	0	0	1	1
-67.4001033	66.57289534	374	19AUG04163708-P2AS_R2C1-010400039010_01_P001	0	0	0	1	1
-67.37915893	66.57991071	375	19AUG04163708-P2AS_R1C1-010400039010_01_P001	0	0	0	1	1
-67.44468954	66.56285304	376	19AUG04163708-P2AS_R2C1-010400039010_01_P001	1	0	0	1	1
-67.44234174	66.56210067	377	19AUG04163708-P2AS_R2C1-010400039010_01_P001	0	0	1	0	1
-67.4410575	66.56071588	378	19AUG04163708-P2AS_R2C1-010400039010_01_P001	1	0	0	1	1
